# Supplementary material
Source: HighWire-hosted journal article supplement (https://diabetes.diabetesjournals.org/content/suppl/2005/03/25/54.4.1171)
Supplement: pg1171MaedaSupplTableS1.pdf [file pg1171MaedaSupplTableS1.pdf]

**Supplementary table 1.** Distribution of *P* values in the first screening

|                      | Genotype    | allele     | dominant<br>model | recessive<br>model | overall     |
|----------------------|-------------|------------|-------------------|--------------------|-------------|
| $P < 0.01$           | 631(0.8)    | 814(1.0)   | 661(0.8)          | 648(0.8)           | 1615(2.0)   |
| $0.01 \leq P < 0.05$ | 2780(3.4)   | 3304(4.1)  | 2724(3.3)         | 2838(3.5)          | 6233(7.7)   |
| $0.05 \leq P < 0.1$  | 3721(4.6)   | 4343(5.3)  | 4039(5.0)         | 4103(5.0)          | 7884(9.7)   |
| $0.1 \leq P < 0.2$   | 7549(9.3)   | 8320(10.2) | 8091(10.0)        | 8218(10.1)         | 13562(16.7) |
| $0.2 \leq P < 0.3$   | 8113(10.0)  | 8059(9.9)  | 6279(7.7)         | 6648(8.2)          | 9759(12.0)  |
| $0.3 \leq P < 0.4$   | 8527(10.5)  | 8646(10.6) | 10352(12.7)       | 10339(12.7)        | 13177(16.2) |
| $0.4 \leq P < 0.5$   | 7583(9.1)   | 7825(9.6)  | 6407(7.9)         | 6620(8.1)          | 7044(8.7)   |
| $0.5 \leq P < 0.6$   | 9281(11.4)  | 8143(10.0) | 7658(9.4)         | 7826(9.6)          | 7405(9.1)   |
| $0.6 \leq P < 0.7$   | 7701(9.5)   | 8062(9.9)  | 6905(8.5)         | 7041(8.7)          | 5418(6.7)   |
| $0.7 \leq P < 0.8$   | 7045(8.7)   | 7488(9.2)  | 7145(8.8)         | 7449(9.2)          | 4250(5.2)   |
| $0.8 \leq P < 0.9$   | 8208(10.1)  | 7330(9.0)  | 6039(7.4)         | 6137(7.5)          | 2352(2.9)   |
| $0.9 \leq P \leq 1$  | 10376(12.8) | 8981(11.0) | 15015(18.5)       | 13448(16.5)        | 2616(3.2)   |
| total                | 81315       | 81315      | 81315             | 81315              | 81315       |

Data are presented as number of SNPs, Percent (%) of total is shown in parenthesis
