# Supplementary material
Source: HighWire-hosted journal article supplement (https://diabetes.diabetesjournals.org/content/suppl/2005/03/25/54.4.1171)
Supplement: pg1171MaedaSupplTableS2.pdf [file pg1171MaedaSupplTableS2.pdf]

**Supplementary table 2**

| position        | dbSNP#     | Forward primer                                                                                                                                   | Reverse primer              |
|-----------------|------------|--------------------------------------------------------------------------------------------------------------------------------------------------|-----------------------------|
| Intron16+101856 | rs4723596  | 5'agcaggctgtttgcagagcc3'                                                                                                                         | 5'gctatacagtcaaagatgaacag3' |
|                 |            | atgttcgtttgaagccgttatgccaaaagagcaagcatttacagccttgctttttatt(a/g)<br>ccaagtgtattttacttgaaaagggttcaatatggccccatagattttattttgcc                      |                             |
| Intron16+104353 | rs11983698 | 5'atgatcaagttcatgccatgttc3'                                                                                                                      | 5'cggcatcacatctttaaagtgac3' |
|                 |            | tgagactgttttctgcaactgaaaaaaaggatagtcctatttggtaggattcttg(a/g)<br>caatgtaatgagtttaaagattccaagcttagagcactgtgccatgcttagtaaacacc                      |                             |
| Intron16+105608 | rs4723593  | 5'attgacttcagcagccaagatg3'                                                                                                                       | 5'ctggcaagtcttcatgaaggc3'   |
|                 |            | ataattgtgtttattctgtgtcctccaaaggactcatcagtaaggaaaggactgcatt(c/t)<br>gggtgagagaatgggagaccagcagatttctgaaaccattgaataactggcttcaca                     |                             |
| Intron16+114454 |            | 5'tcagcctgtctgcatgtggc3'                                                                                                                         | 5'tctatggcactctgcatgtc3'    |
|                 |            | gctcccctgtgacatcgcgtcttcccttgggtgaggcaagtatgtgtctttccactgtcc(c/t)<br>aggctgagagctcatccggcacagggcctccagtgtcgcgtcattccttgactgagtag                 |                             |
| Intron17+5495   | rs7799004  | 5'ataactcaacctggcctagtg3'                                                                                                                        | 5'taagcactgagcaggaatgtaag3' |
|                 |            | actttctttccactcagtgcaggggttcttcaaagctgcaatttactgagtcatttttag(a/g)<br>tagagctaagtgtgataataaatagtttagtgatctgaaagcctgaaatgagaccctaa                 |                             |
| Intron18+9170   | rs741301   | 5'tggtcatactatccagagaag3'                                                                                                                        | 5'cctggaggaacaagcagttc3'    |
|                 | *          | taaataaataaggagcagttcccatgggtggtatcattagtataacataacct <b>ctggaa</b> (a/g)<br><b>cc</b> accacctcataaaatctattgctattgagcttgaagagtcaatgactttactaatgg |                             |
| Intron19+2430   | rs1558688  | 5'aactgtgattccccaaatgtgg3'                                                                                                                       | 5'caagtatgattgttagttcatc3'  |
|                 |            | gctgcaaatctccacacagcttttcgagtgccactgagcaaggctggttcttgaagg(g/a)<br>ttgtgacagcccctctgaccatgcctccaaaactcttagcaactgcttctctgaaat                      |                             |
| Intron20+1239   | rs3807163  | 5'atgcagctgaagaggctgattg3'                                                                                                                       | 5'agcacactgaattctggcagg3'   |
|                 |            | catttgattggcaagcactatgatggcagggcatgcccaagaggccaggatctgtgtct(a/g)<br>tctgttacacagaccaacgggggttccgtttatcttctccatgctatggggagaca                     |                             |
| 3'flanking+735  |            | 5'aactaggttctgtactcag3'                                                                                                                          | 5'tcaggacctcagagatcctg3'    |
|                 |            | tacagattgacctgggttgagatgatatggccagagcactgcatgcattgcaggaaaa(a/t)<br>gtcctttgacttcacaggggttcttctccatcagagcactcacacctgtgtcaagct                     |                             |
| Intron1+5853    | rs1541727  | 5'aactggcatagtgtgagtcg3'                                                                                                                         | 5'tgcattctagctcatatgcttc3'  |

|  |                                                                                                                                |
|--|--------------------------------------------------------------------------------------------------------------------------------|
|  | gtagttccttcttttgttggtcactggacttggcagcctctgaggccaggatgcatg(t/g)<br>ggagctatgctgcagtgggtgtccagagaggctctcactcctgtatgtcctgcagatgga |
|--|--------------------------------------------------------------------------------------------------------------------------------|

\*Sequence identical for GCR-1 binding site is indicated as bold underlined characters.
