# Supplementary material
Source: HighWire-hosted journal article supplement (https://diabetes.diabetesjournals.org/content/suppl/2005/03/25/54.4.1171)

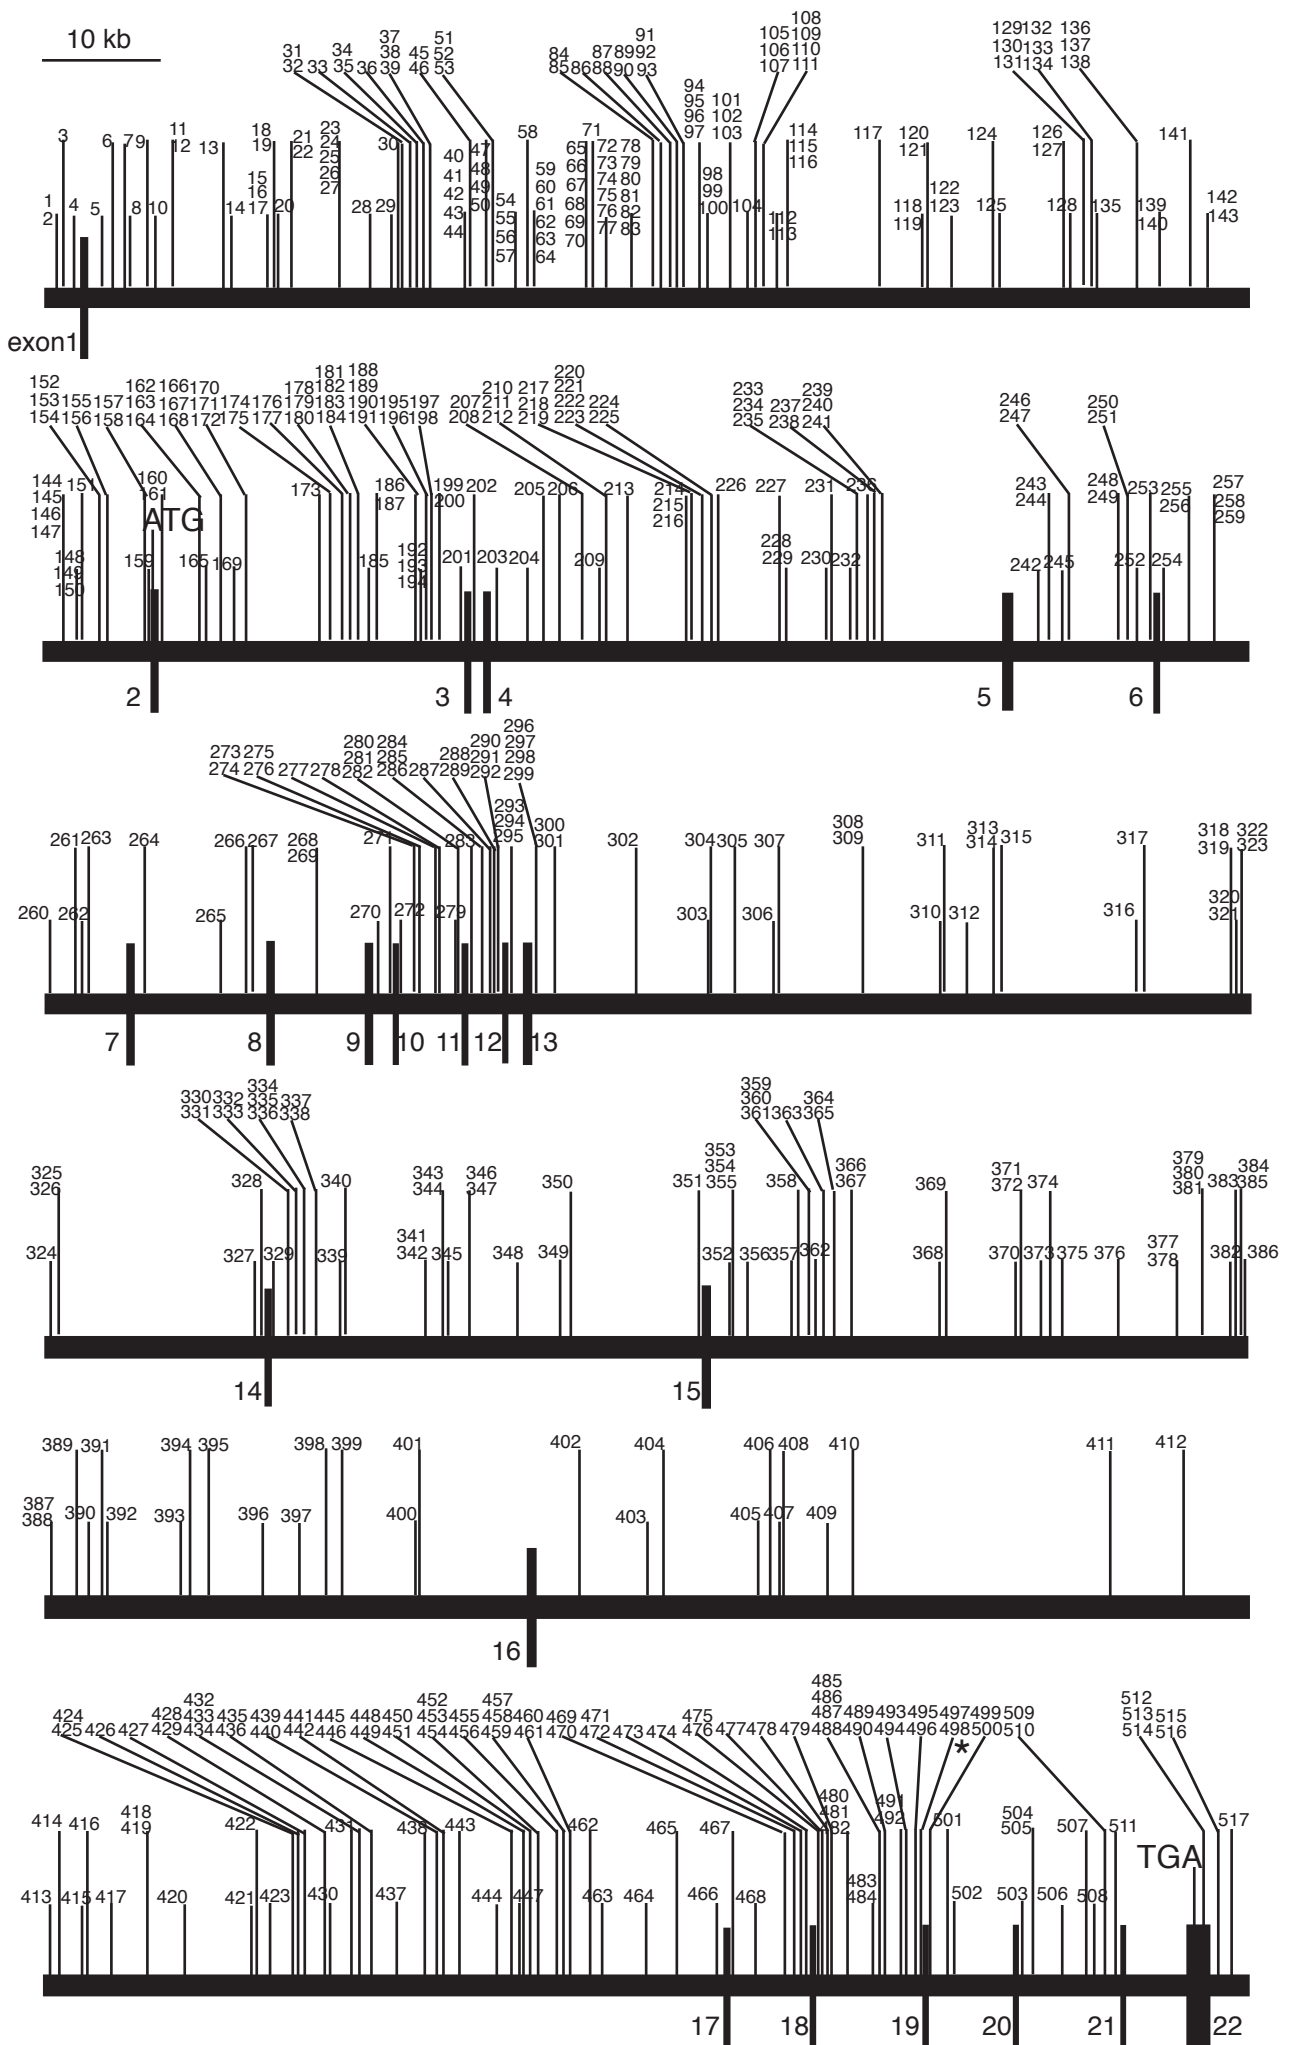

Supplement: pg1171MaedaSupplFigS.pdf [file pg1171MaedaSupplFigS.pdf]
